# Supplementary material for: Molecular characterisation of atypical BSE prions by mass spectrometry and changes following transmission to sheep and transgenic mouse models
Source: PLOS journal article supplement (doi:10.1371/journal.pone.0206505), 2018-11-08
Supplement: S11 (10.1371/journal.pone.0206505.s011) [file journal.pone.0206505.s011]

**S2 Table. Bovine and ovine PrP semi-tryptic peptides used for N-terminal amino acid profiling.** The semi-tryptic peptides are the product of N-terminal cleavage by PK of tryptic peptide T7-T9, a sequence which includes two KP missed cleavages. Amino acid residues in bold: bovine/ovine interspecies polymorphisms. pE denotes a pyroglutamyl N-terminal amino acid residue.

| N-terminus | Bovine                                      | In Assay | Plotted | Ovine                                       | In Assay | Plotted |
|------------|---------------------------------------------|----------|---------|---------------------------------------------|----------|---------|
| G77        | GQPHGGGGWGQPHGGGGWGQGG <b>THG</b> QWNKPSKPK | ✓        | ✓       | GQPHGGGGWGQPHGGGGWGQGG <b>SHS</b> QWNKPSKPK | ✓        | ✓       |
| G81        | GGGWGQPHGGGGWGQGG <b>THG</b> QWNKPSKPK      | ✓        | ✓       | GGGWGQPHGGGGWGQGG <b>SHS</b> QWNKPSKPK      | ✓        | ✓       |
| G85        | GQPHGGGGWGQGG <b>THG</b> QWNKPSKPK          | ✓        | ✓       | GQPHGGGGWGQGG <b>SHS</b> QWNKPSKPK          | ✓        | ✓       |
| Q86        | QPHGGGGWGQGG <b>THG</b> QWNKPSKPK           | ✓        | ✓       | QPHGGGGWGQGG <b>SHS</b> QWNKPSKPK           | ✓        | ✓       |
| pE86       | pEPHGGGGWGQGG <b>THG</b> QWNKPSKPK          | ✓        | ✓       | pEPHGGGGWGQGG <b>SHS</b> QWNKPSKPK          | ✓        | ✓       |
| P87        | PHGGGGWGQGG <b>THG</b> QWNKPSKPK            | ✗        | ✗       | PHGGGGWGQGG <b>SHS</b> QWNKPSKPK            | ✓        | ✗       |
| H88        | HGGGGWGQGG <b>THG</b> QWNKPSKPK             | ✗        | ✗       | HGGGGWGQGG <b>SHS</b> QWNKPSKPK             | ✓        | ✗       |
| G89        | GGGGWGQGG <b>THG</b> QWNKPSKPK              | ✓        | ✓       | GGGGWGQGG <b>SHS</b> QWNKPSKPK              | ✓        | ✓       |
| G90        | GGGWGQGG <b>THG</b> QWNKPSKPK               | ✓        | ✓       | GGGWGQGG <b>SHS</b> QWNKPSKPK               | ✓        | ✓       |
| G91        | GGWGQGG <b>THG</b> QWNKPSKPK                | ✓        | ✓       | GGWGQGG <b>SHS</b> QWNKPSKPK                | ✓        | ✓       |
| G92        | GWGQGG <b>THG</b> QWNKPSKPK                 | ✓        | ✓       | GWGQGG <b>SHS</b> QWNKPSKPK                 | ✓        | ✓       |
| W93        | WGQGG <b>THG</b> QWNKPSKPK                  | ✓        | ✓       | WGQGG <b>SHS</b> QWNKPSKPK                  | ✓        | ✓       |
| G94        | GQGG <b>THG</b> QWNKPSKPK                   | ✓        | ✓       | GQGG <b>SHS</b> QWNKPSKPK                   | ✓        | ✓       |
| Q95        | QGG <b>THG</b> QWNKPSKPK                    | ✓        | ✓       | QGG <b>SHS</b> QWNKPSKPK                    | ✓        | ✓       |
| pE95       | pQGG <b>THG</b> QWNKPSKPK                   | ✓        | ✓       | pEGG <b>SHS</b> QWNKPSKPK                   | ✓        | ✓       |
| G96        | GG <b>THG</b> QWNKPSKPK                     | ✓        | ✓       | GG <b>SHS</b> QWNKPSKPK                     | ✓        | ✓       |
| G97        | G <b>THG</b> QWNKPSKPK                      | ✓        | ✓       | G <b>SHS</b> QWNKPSKPK                      | ✓        | ✓       |
| T98/S98    | <b>THG</b> QWNKPSKPK                        | ✓        | ✓       | <b>SHS</b> QWNKPSKPK                        | ✓        | ✓       |
| H99        | H <b>G</b> QWNKPSKPK                        | ✓        | ✓       | H <b>S</b> QWNKPSKPK                        | ✓        | ✓       |
| G100/S100  | <b>G</b> QWNKPSKPK                          | ✓        | ✓       | <b>S</b> QWNKPSKPK                          | ✓        | ✓       |
| Q101       | QWNKPSKPK                                   | ✓        | ✓       | QWNKPSKPK                                   | ✓        | ✓       |
| pE101      | pEWNKPSKPK                                  | ✓        | ✓       | pEWNKPSKPK                                  | ✓        | ✓       |
| W102       | WNKPSKPK                                    | ✓        | ✓       | WNKPSKPK                                    | ✓        | ✓       |
| N103       | NKPSKPK <sup>a</sup>                        | ✓        | ✗       | NKPSKPK                                     | ✓        | ✗       |

<sup>a</sup> Unfavourable chromatographic properties (too hydrophilic) do not allow this peptide to be reliably detected
